# Supplementary material for: Atg7 cooperates with Pten loss to drive prostate cancer tumor growth
Source: PubMed Central journal article supplement — Genes Dev. 2016 Feb 15;30(4):399–407. doi: 10.1101/gad.274134.115 (PMC4762425; doi:10.1101/gad.274134.115), 2016-02-15

2 weeks

3 months

6 months

9 months

Active Caspase-3

 $Pten^{\Delta/\Delta};Atg7^{+/+}$  $Pten^{\Delta/\Delta};Atg7^{\Delta/\Delta}$ 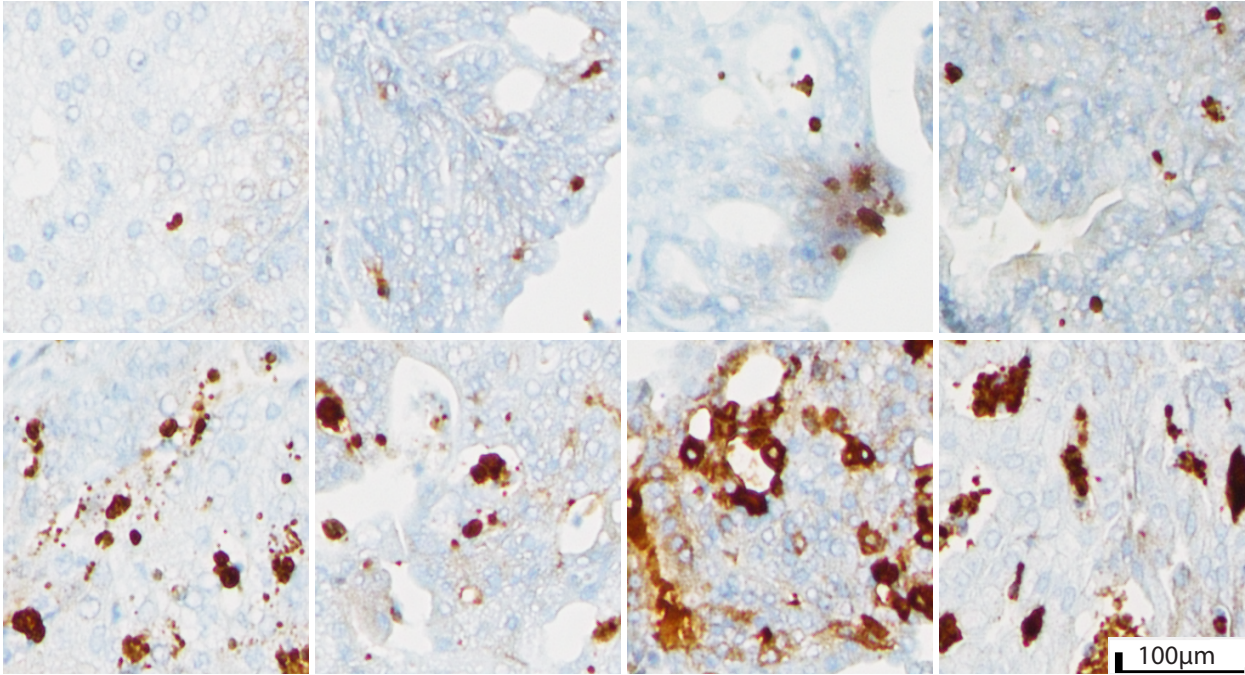

KI-67

 $Pten^{\Delta/\Delta};Atg7^{+/+}$  $Pten^{\Delta/\Delta};Atg7^{\Delta/\Delta}$ 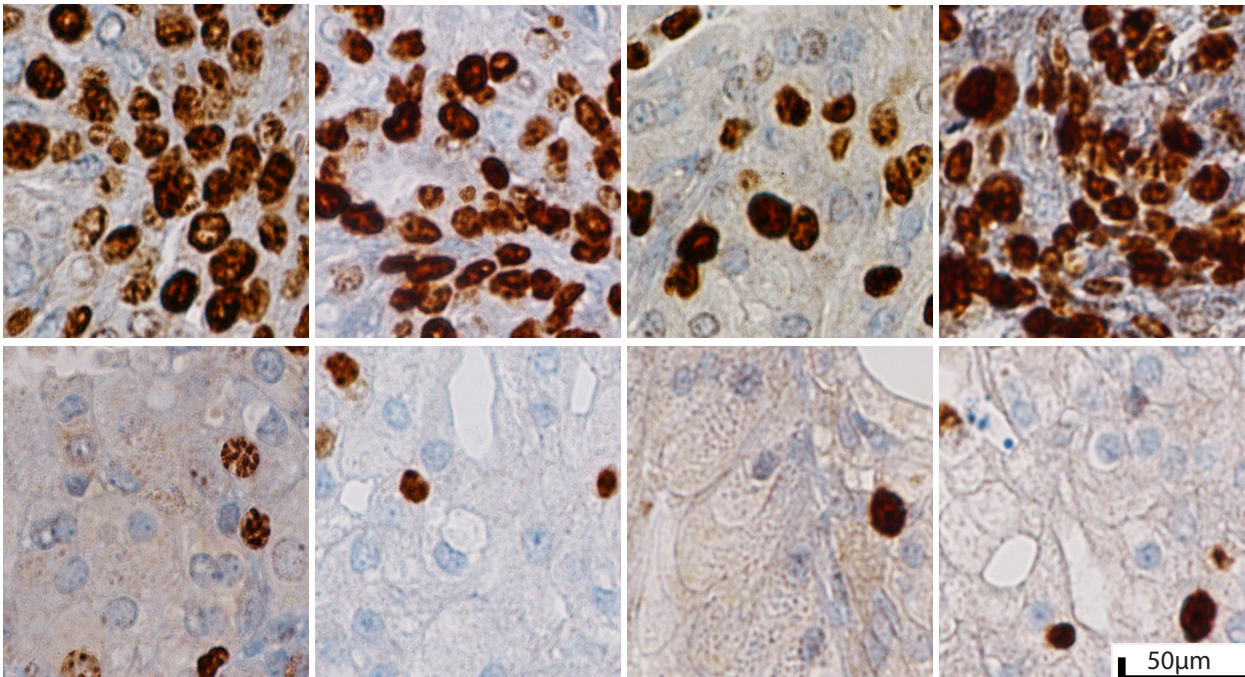

Supplement: supp_30.4.399_Fig_S2.pdf [file supp_30.4.399_Fig_S2.pdf]
