# Supplementary figures and images for: Atg7 cooperates with Pten loss to drive prostate cancer tumor growth
Source: PubMed Central journal article supplement — Genes Dev. 2016 Feb 15;30(4):399–407. doi: 10.1101/gad.274134.115 (PMC4762425; doi:10.1101/gad.274134.115), 2016-02-15

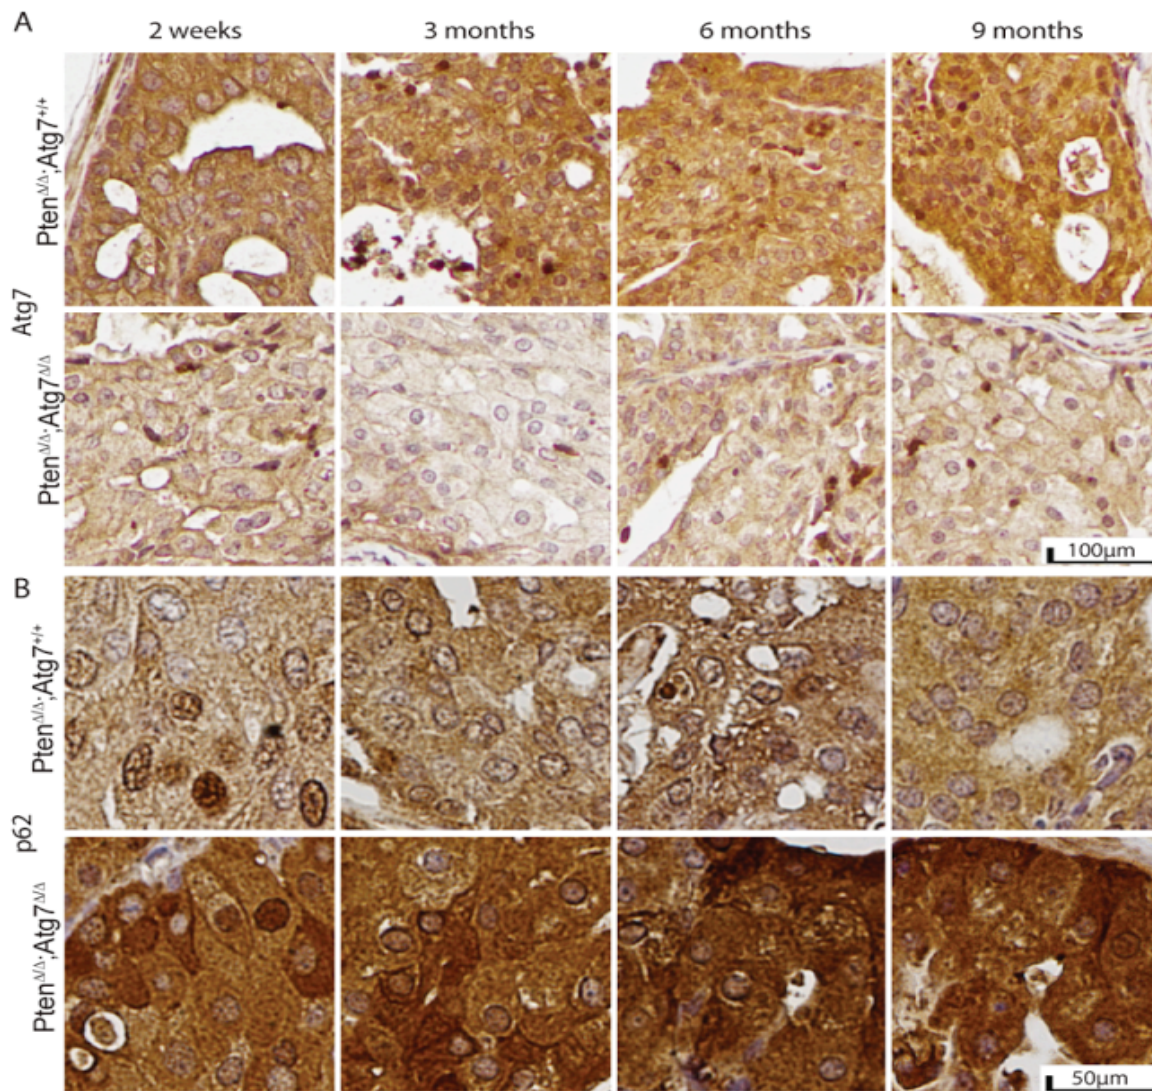

Supplement: supp_30.4.399_Fig_S1.pdf [file supp_30.4.399_Fig_S1.pdf]

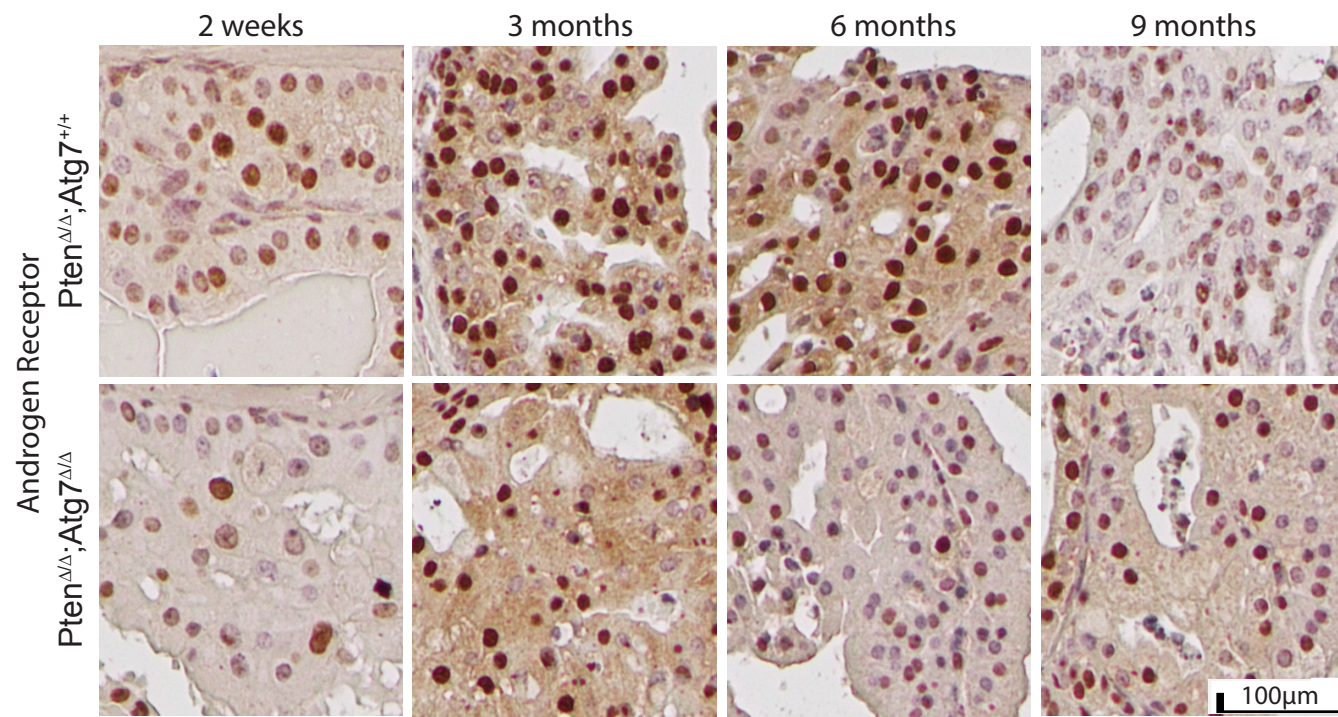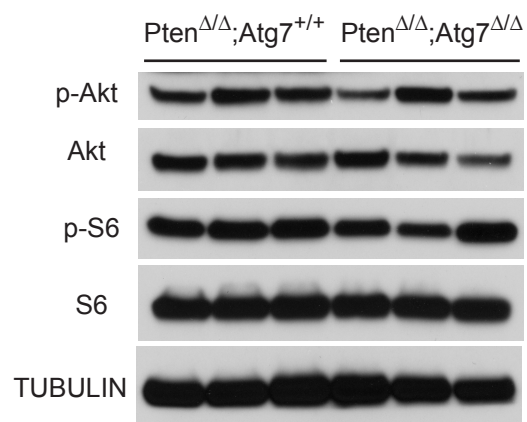

Supplement: supp_30.4.399_Fig_S3.pdf [file supp_30.4.399_Fig_S3.pdf]

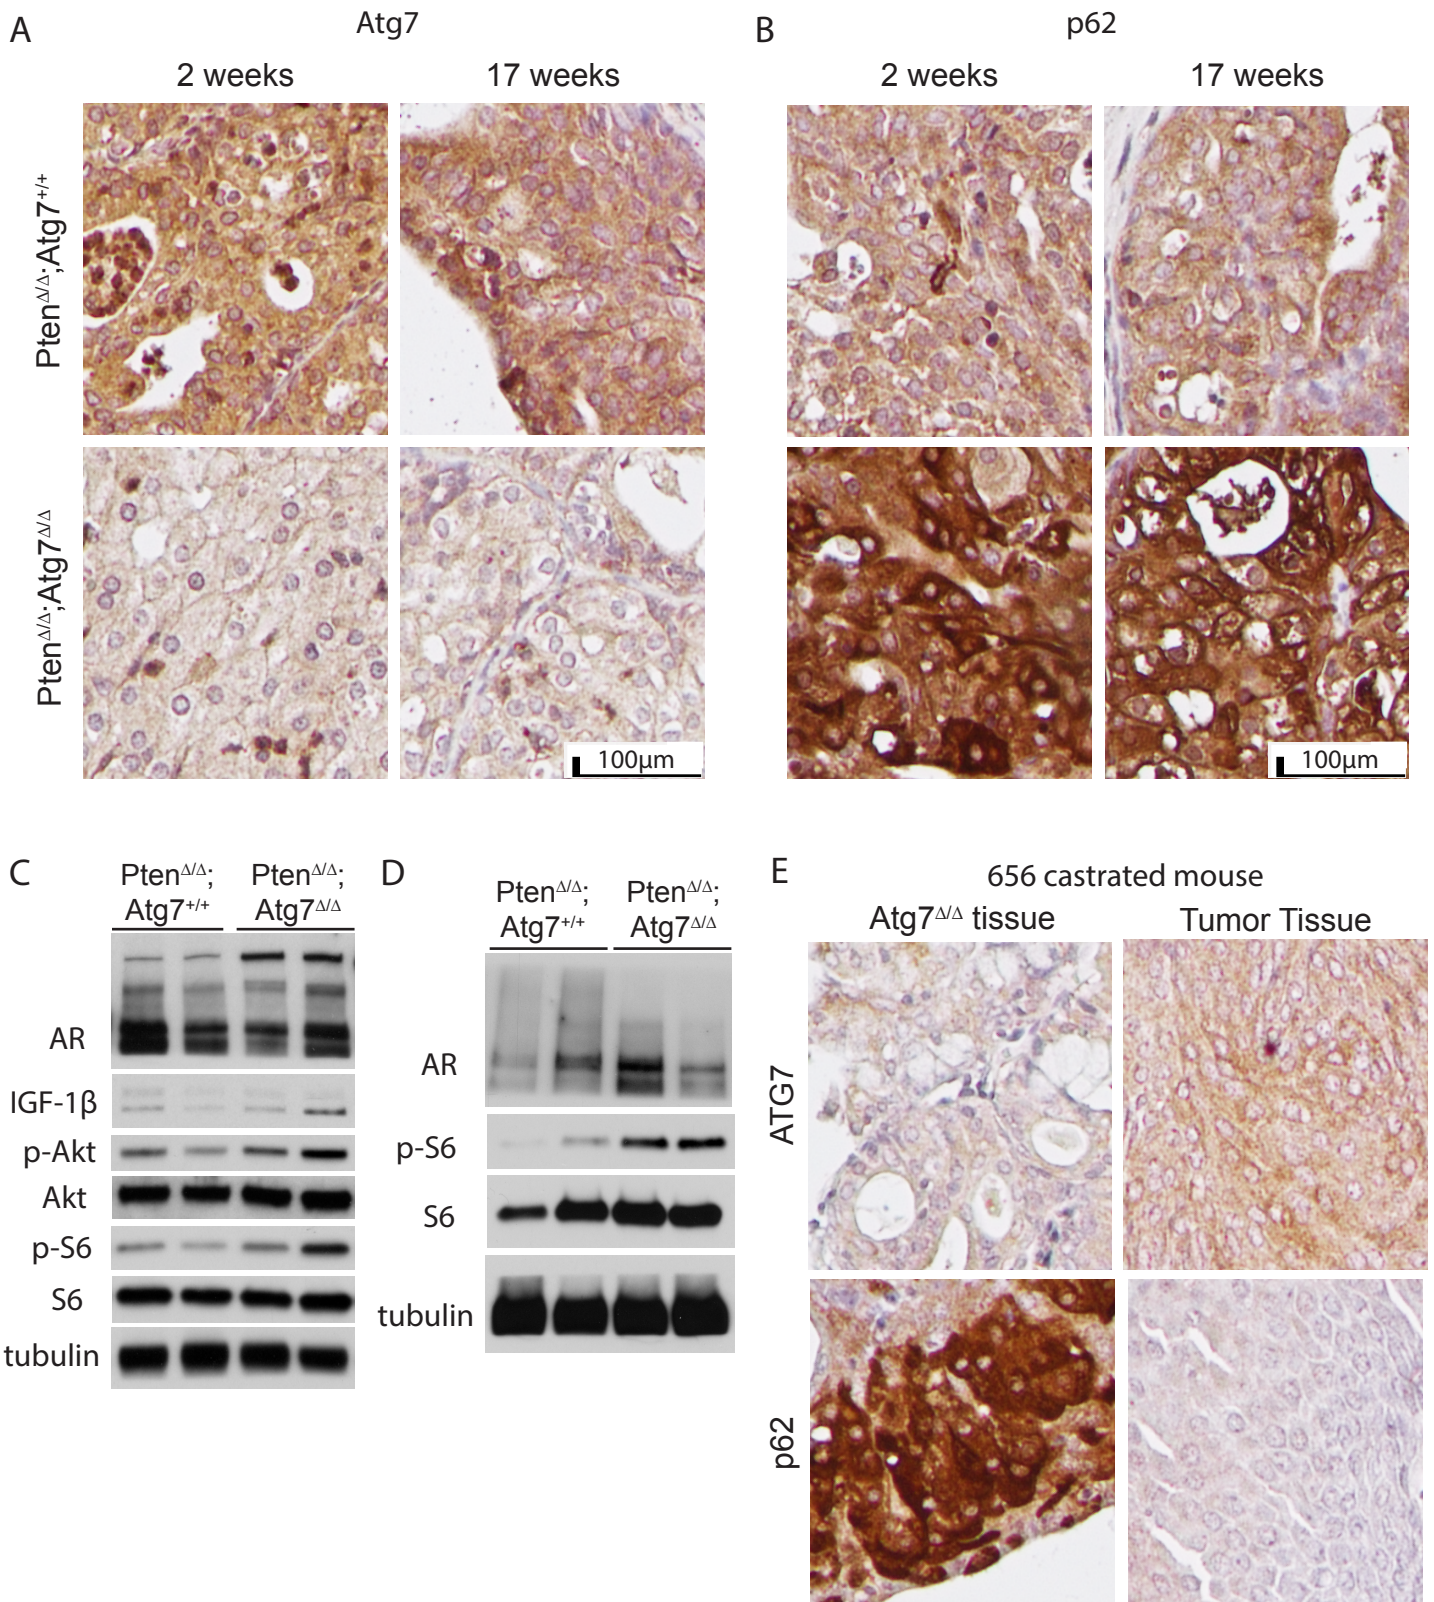

Supplement: supp_30.4.399_Fig_S4.pdf [file supp_30.4.399_Fig_S4.pdf]
